# Supplementary material
Source: PubMed Central journal article supplement (PMC5407951)
Supplement: NIHMS845232-supplement-supplementary_data.pdf [file NIHMS845232-supplement-supplementary_data.pdf]

**Electronic Supplementary Material**

**[<sup>18</sup>F]Fluorocholine PET/CT Imaging of Liver Cancer: Radiopathologic Correlation  
with Tissue Phospholipid Profiling**

**Journal: Molecular Imaging and Biology**

Sandi A Kwee<sup>1,2</sup>, Miles M Sato<sup>3</sup>, Yu Kuang<sup>4</sup>, Adrian Franke<sup>5</sup>, Laurie Custer<sup>5</sup>, Kyle Miyazaki<sup>2</sup>,  
Linda L Wong<sup>2,5</sup>.

<sup>1</sup> Hamamatsu/Queen's PET Imaging Center, The Queen's Medical Center, Honolulu, HI

<sup>2</sup> University of Hawaii John A. Burns School of Medicine, Honolulu, HI

<sup>3</sup> Oncology Research, The Queen's Medical Center, Honolulu, HI, USA

<sup>4</sup> University of Nevada Las Vegas, Department of Medical Physics, Las Vegas, NV

<sup>5</sup> University of Hawaii Cancer Center, University of Hawaii at Manoa, Honolulu, HI

Corresponding Author: Sandi A. Kwee, MD, PhD

Hamamatsu/Queen's PET Imaging Center, The Queen's Medical Center,  
and, Department of Medicine, University of Hawaii John A. Burns School of Medicine

Tel: (808) 691-5466; Fax: (808) 691-7813; Email: [kwee@hawaii.edu](mailto:kwee@hawaii.edu)

Author Contributions: Conceived and designed experiments: SAK, MMS, YK, AF, LC, LLW.  
Performed the experiments: SAK, AF, LC, KM. Analyzed the data: SAK, MMS, YK, AF, LC,  
KM, LLW. Contributed materials/analysis tools: SAK, MMS, YK, AF, LC, LLW. Writing and  
final manuscript approval: SAK, MMS, YK, AF, LC, KM, LLW.

Supplementary Table 1. Mass-to-charge (m/z) ratios that include phosphatidylcholine species with poly-unsaturated fatty acyls

|                                   |                                   | m/z ratio                       |                                       |                                       |                                       |                                     |
|-----------------------------------|-----------------------------------|---------------------------------|---------------------------------------|---------------------------------------|---------------------------------------|-------------------------------------|
| <b>786.5677</b>                   |                                   | <b>780.5573</b>                 | <b>782.5692</b>                       | <b>784.5815</b>                       | <b>786.6014</b>                       | <b>788.6106</b>                     |
| 14:1 [92] / 20:1 [112]            | 18:2 [92,122] / 18:3 [92,122,152] | 22:4 [72,102,132,162] / 14:0    | 22:2 [132,162] / 14:1 [92]            | 22:2 [132,162] / 14:1 [92]            | 14:1 [92] / 22:1 [132]                | 14:1 [92] / 22:1 [132]              |
| 16:1 [92] / 18:1 [112]            | 16:1 [92] / 20:4 [82,112,142,172] | 18:0 / 18:4 [62,92,122,152]     | 18:0 / 18:4 [62,92,122,152]           | 18:3 [92,122,152] / 18:0              | 18:1 [92] / 18:1 [112]                | 18:1 [92] / 18:1 [112]              |
| 18:1 [112] / 16:1 [92]            | 18:3 [92,122,152] / 18:2 [92,122] | 20:3 [52,82,112] / 16:1 [92]    | 20:3 [52,82,112] / 16:1 [92]          | 18:1 [92] / 18:2 [92,122]             | 14:0 / 22:2 [132,162]                 | 14:0 / 22:2 [132,162]               |
| 18:2 [92,122] / 16:0              | 18:4 [62,92,122,152] / 18:1 [112] | 20:4 [52,82,112,142] / 16:0     | 20:4 [52,82,112,142] / 16:0           | 20:3 [82,112,142] / 16:0              | 18:0 / 18:2 [92,122]                  | 18:0 / 18:2 [92,122]                |
| 20:1 [112] / 14:1 [92]            | 20:4 [52,82,112,142] / 16:1 [92]  | 18:3 [92,122,152] / 18:1 [92]   | 18:3 [92,122,152] / 18:1 [92]         | 20:2 [112,142] / 16:1 [92]            | 20:1 [112] / 16:1 [92]                | 20:1 [112] / 16:1 [92]              |
| 16:0 / 18:2 [92,122]              | 22:5 [42,72,102,132,162] / 14:0   | 22:5 [42,72,102,132,162] / 14:0 | 16:0 / 20:4 [52,82,112,142]           | 16:0 / 20:4 [52,82,112,142]           | 18:1 [112] / 18:2 [92,122]            | 22:2 [132,162] / 14:0               |
|                                   | 14:1 [92] / 22:4 [72,102,132,162] | 18:1 [112] / 18:3 [92,122,152]  | 18:1 [112] / 18:3 [92,122,152]        | 18:1 [112] / 18:3 [92,122,152]        | 18:1 [112] / 18:1 [92]                | 18:1 [112] / 18:1 [92]              |
|                                   | 20:5 [52,82,112,142,172] / 16:0   | 18:3 [62,92,122] / 18:1 [92]    | 18:3 [62,92,122] / 18:1 [92]          | 18:0 / 18:3 [92,122,152]              | 18:4 [62,92,122,152] / 18:1 [92]      | 18:4 [62,92,122,152] / 18:1 [92]    |
|                                   | 22:4 [72,102,132,162] / 14:1 [92] | 16:0 / 20:4 [82,112,142,172]    | 16:0 / 20:4 [82,112,142,172]          | 16:1 [92] / 20:2 [112,142]            | 16:0 / 22:6 [42,72,102,132,162,192]   | 16:0 / 22:6 [42,72,102,132,162,192] |
|                                   | 18:4 [62,92,122,152] / 18:1 [92]  | 18:2 [92,122] / 18:2 [92,122]   | 18:2 [92,122] / 18:2 [92,122]         | 18:2 [92,122] / 18:1 [112]            | 20:4 [52,82,112,142] / 18:2 [92,122]  | 20:2 [112,142] / 18:3 [62,92,122]   |
|                                   | 18:1 [92] / 18:4 [62,92,122,152]  | 18:1 [92] / 18:3 [62,92,122]    | 20:3 [52,82,112] / 16:0               | 20:3 [52,82,112] / 16:0               | 18:3 [62,92,122] / 20:3 [82,112,142]  | 18:2 [92,122] / 20:3 [52,82,112]    |
|                                   | 14:0 / 22:5 [72,102,132,162,192]  | 14:0 / 22:4 [72,102,132,162]    | 16:0 / 20:3 [82,112,142]              | 16:0 / 20:3 [82,112,142]              | 18:1 [92] / 20:5 [52,82,112,142,172]  | 18:1 [92] / 20:4 [82,112,142,172]   |
|                                   | 22:5 [72,102,132,162,192] / 14:0  | 18:3 [62,92,122] / 18:1 [112]   | 18:3 [62,92,122] / 18:0               | 18:2 [92,122] / 20:4 [82,112,142,172] | 16:1 [92] / 22:5 [72,102,132,162,192] | 20:3 [52,82,112] / 18:2 [92,122]    |
|                                   | 18:1 [112] / 18:4 [62,92,122,152] | 20:3 [82,112,142] / 16:1 [92]   | 18:0 / 18:3 [62,92,122]               | 18:2 [92,122] / 20:4 [82,112,142,172] | 20:1 [112] / 18:4 [62,92,122,152]     | 20:1 [112] / 18:4 [62,92,122,152]   |
|                                   | 14:0 / 22:5 [42,72,102,132,162]   | 18:3 [92,122,152] / 18:1 [112]  | 16:0 / 20:3 [52,82,112]               | 20:3 [52,82,112] / 18:3 [92,122,152]  | 20:3 [52,82,112] / 18:3 [92,122,152]  | 20:4 [52,82,112,142] / 18:1 [112]   |
|                                   | 20:4 [82,112,142,172] / 16:1 [92] | 18:4 [62,92,122,152] / 18:0     | 14:1 [92] / 22:2 [132,162]            | 18:1 [112] / 20:5 [52,82,112,142,172] | 18:1 [112] / 20:5 [52,82,112,142,172] | 18:4 [62,92,122,152] / 20:1 [112]   |
|                                   | 16:0 / 20:5 [52,82,112,142,172]   | 20:4 [82,112,142,172] / 16:0    | 20:4 [82,112,142,172] / 16:0          | 16:1 [92] / 22:5 [42,72,102,132,162]  | 20:4 [82,112,142,172] / 18:1 [112]    | 20:4 [82,112,142,172] / 18:1 [112]  |
|                                   | 16:1 [92] / 20:4 [52,82,112,142]  | 16:1 [92] / 20:3 [82,112,142]   | 16:1 [92] / 20:3 [82,112,142]         | 20:4 [82,112,142] / 18:3 [92,122,152] | 22:5 [42,72,102,132,162] / 16:0       | 22:5 [42,72,102,132,162] / 16:0     |
|                                   | 18:3 [62,92,122] / 18:2 [92,122]  | 18:1 [112] / 18:3 [62,92,122]   | 18:1 [112] / 18:3 [62,92,122]         | 22:6 [42,72,102,132,162,192] / 16:0   | 20:3 [82,112,142] / 18:2 [92,122]     | 20:3 [82,112,142] / 18:2 [92,122]   |
|                                   | 16:1 [92] / 18:3 [92,122,152]     | 16:1 [92] / 20:3 [52,82,112]    | 16:1 [92] / 20:3 [52,82,112]          | 18:3 [92,122,152] / 20:3 [82,112,142] | 18:1 [112] / 20:4 [52,82,112,142]     | 18:1 [112] / 20:4 [52,82,112,142]   |
|                                   |                                   |                                 |                                       |                                       | 18:3 [92,122,152] / 20:2 [112,142]    |                                     |
| <b>780.5573</b>                   |                                   | <b>782.5692</b>                 | <b>784.5815</b>                       | <b>806.5683</b>                       | <b>808.5808</b>                       |                                     |
| 18:2 [92,122] / 18:3 [92,122,152] | 22:4 [72,102,132,162] / 14:0      | 22:2 [132,162] / 14:1 [92]      | 20:5 [52,82,112,142,172] / 18:1 [112] | 20:5 [52,82,112,142,172] / 18:1 [112] | 16:0 / 22:5 [42,72,102,132,162]       |                                     |
| 16:1 [92] / 20:4 [82,112,142,172] | 18:0 / 18:4 [62,92,122,152]       | 18:3 [92,122,152] / 18:0        | 20:3 [82,112,142] / 18:3 [62,92,122]  | 20:3 [82,112,142] / 18:3 [62,92,122]  | 18:3 [62,92,122] / 20:2 [112,142]     |                                     |
| 18:3 [92,122,152] / 18:2 [92,122] | 20:3 [52,82,112] / 16:1 [92]      | 18:1 [92] / 18:2 [92,122]       | 18:3 [92,122,152] / 20:3 [52,82,112]  | 18:3 [92,122,152] / 20:3 [52,82,112]  | 16:1 [92] / 22:4 [72,102,132,162]     |                                     |
| 18:4 [62,92,122,152] / 18:1 [112] | 20:4 [52,82,112,142] / 16:0       | 20:3 [82,112,142] / 16:0        | 20:2 [112,142] / 16:1 [92]            | 20:2 [112,142] / 16:1 [92]            | 18:2 [92,122] / 20:3 [82,112,142]     |                                     |
| 20:4 [52,82,112,142] / 16:1 [92]  | 18:3 [92,122,152] / 18:1 [92]     | 20:2 [112,142] / 16:1 [92]      | 22:5 [72,102,132,162,192] / 16:1 [92] | 22:5 [72,102,132,162,192] / 16:1 [92] | 20:4 [52,82,112,142] / 18:1 [92]      |                                     |
| 22:5 [42,72,102,132,162] / 14:0   | 16:0 / 20:4 [52,82,112,142]       | 18:1 [112] / 18:2 [92,122]      | 20:3 [52,82,112] / 18:3 [62,92,122]   | 20:3 [52,82,112] / 18:3 [62,92,122]   | 20:5 [52,82,112,142,172] / 18:0       |                                     |
| 14:1 [92] / 22:4 [72,102,132,162] | 18:3 [62,92,122] / 18:1 [92]      | 18:2 [92,122] / 18:1 [92]       | 20:5 [52,82,112,142,172] / 18:1 [92]  | 20:5 [52,82,112,142,172] / 18:1 [92]  | 18:1 [112] / 20:4 [82,112,142,172]    |                                     |
| 20:5 [52,82,112,142,172] / 16:0   | 18:3 [62,92,122] / 18:1 [92]      | 18:0 / 18:3 [92,122,152]        | 18:4 [62,92,122,152] / 20:2 [112,142] | 18:4 [62,92,122,152] / 20:2 [112,142] | 18:1 [92] / 20:4 [52,82,112,142]      |                                     |
| 22:4 [72,102,132,162] / 14:1 [92] | 16:0 / 20:4 [82,112,142,172]      | 16:1 [92] / 20:2 [112,142]      | 16:0 / 22:6 [42,72,102,132,162,192]   | 16:0 / 22:6 [42,72,102,132,162,192]   | 16:0 / 22:5 [72,102,132,162,192]      |                                     |
| 18:4 [62,92,122,152] / 18:1 [92]  | 18:2 [92,122] / 18:2 [92,122]     | 18:2 [92,122] / 18:1 [112]      | 20:4 [52,82,112,142] / 18:2 [92,122]  | 20:4 [52,82,112,142] / 18:2 [92,122]  | 20:2 [112,142] / 18:3 [62,92,122]     |                                     |
| 18:1 [92] / 18:4 [62,92,122,152]  | 18:1 [92] / 18:3 [62,92,122]      | 20:3 [52,82,112] / 16:0         | 18:3 [62,92,122] / 20:3 [82,112,142]  | 18:3 [62,92,122] / 20:3 [82,112,142]  | 18:2 [92,122] / 20:3 [52,82,112]      |                                     |
| 14:0 / 22:5 [72,102,132,162,192]  | 14:0 / 22:4 [72,102,132,162]      | 16:0 / 20:3 [82,112,142]        | 16:0 / 22:6 [42,72,102,132,162,192]   | 16:0 / 22:6 [42,72,102,132,162,192]   | 18:1 [92] / 20:4 [82,112,142,172]     |                                     |
| 22:5 [72,102,132,162,192] / 14:0  | 18:3 [62,92,122] / 18:1 [112]     | 18:0 / 18:3 [62,92,122]         | 18:2 [92,122] / 20:4 [82,112,142,172] | 18:2 [92,122] / 20:4 [82,112,142,172] | 20:3 [52,82,112] / 18:2 [92,122]      |                                     |
| 18:1 [112] / 18:4 [62,92,122,152] | 20:3 [82,112,142] / 16:1 [92]     | 18:0 / 18:3 [62,92,122]         | 20:3 [52,82,112] / 18:3 [92,122,152]  | 20:3 [52,82,112] / 18:3 [92,122,152]  | 20:1 [112] / 18:4 [62,92,122,152]     |                                     |
| 14:0 / 22:5 [42,72,102,132,162]   | 18:3 [92,122,152] / 18:1 [112]    | 16:0 / 20:3 [52,82,112]         | 18:1 [112] / 20:5 [52,82,112,142,172] | 18:1 [112] / 20:5 [52,82,112,142,172] | 20:4 [52,82,112,142] / 18:1 [112]     |                                     |
| 20:4 [82,112,142,172] / 16:1 [92] | 18:4 [62,92,122,152] / 18:0       | 14:1 [92] / 22:2 [132,162]      | 18:1 [112] / 20:5 [52,82,112,142,172] | 18:1 [112] / 20:5 [52,82,112,142,172] | 18:4 [62,92,122,152] / 20:1 [112]     |                                     |
| 16:0 / 20:5 [52,82,112,142,172]   | 20:4 [82,112,142,172] / 16:0      | 20:4 [82,112,142,172] / 16:0    | 16:1 [92] / 22:5 [42,72,102,132,162]  | 16:1 [92] / 22:5 [42,72,102,132,162]  | 20:4 [82,112,142,172] / 18:1 [112]    |                                     |
| 16:1 [92] / 20:4 [52,82,112,142]  | 16:1 [92] / 20:3 [82,112,142]     | 16:1 [92] / 20:3 [82,112,142]   | 20:4 [82,112,142] / 18:3 [92,122,152] | 20:4 [82,112,142] / 18:3 [92,122,152] | 22:5 [42,72,102,132,162] / 16:0       |                                     |
| 18:3 [62,92,122] / 18:2 [92,122]  | 18:1 [112] / 18:3 [62,92,122]     | 18:1 [112] / 18:3 [62,92,122]   | 22:6 [42,72,102,132,162,192] / 16:0   | 22:6 [42,72,102,132,162,192] / 16:0   | 20:3 [82,112,142] / 18:2 [92,122]     |                                     |
| 16:1 [92] / 18:3 [92,122,152]     | 16:1 [92] / 20:3 [52,82,112]      | 16:1 [92] / 20:3 [52,82,112]    | 18:3 [92,122,152] / 20:3 [82,112,142] | 18:3 [92,122,152] / 20:3 [82,112,142] | 18:1 [112] / 20:4 [52,82,112,142]     |                                     |
|                                   |                                   |                                 |                                       |                                       | 18:1 [112] / 20:4 [52,82,112,142]     |                                     |

Supplementary Table 1 (Cont'd). Mass-to-charge (m/z) ratios that include phosphatidylcholine species with poly-unsaturated fatty acyls

|                                                                                                                                                                                                                                                                                                                                                                                                                                                                                                                                                                                                                                                                                                          | m/z ratio                                                                                                                                                                                                                                                                                                                                                                                                                                                                                                                                                                                                                                                                                                                                                                                                                                                                                                                                                                                                                                                                                                                                                         |                                                                                                                                                                                                                                                                                                                                                                                                                                                                                                                                                                                                                                                                                                                                                                                                                                                                                                                                                                                                              |
|----------------------------------------------------------------------------------------------------------------------------------------------------------------------------------------------------------------------------------------------------------------------------------------------------------------------------------------------------------------------------------------------------------------------------------------------------------------------------------------------------------------------------------------------------------------------------------------------------------------------------------------------------------------------------------------------------------|-------------------------------------------------------------------------------------------------------------------------------------------------------------------------------------------------------------------------------------------------------------------------------------------------------------------------------------------------------------------------------------------------------------------------------------------------------------------------------------------------------------------------------------------------------------------------------------------------------------------------------------------------------------------------------------------------------------------------------------------------------------------------------------------------------------------------------------------------------------------------------------------------------------------------------------------------------------------------------------------------------------------------------------------------------------------------------------------------------------------------------------------------------------------|--------------------------------------------------------------------------------------------------------------------------------------------------------------------------------------------------------------------------------------------------------------------------------------------------------------------------------------------------------------------------------------------------------------------------------------------------------------------------------------------------------------------------------------------------------------------------------------------------------------------------------------------------------------------------------------------------------------------------------------------------------------------------------------------------------------------------------------------------------------------------------------------------------------------------------------------------------------------------------------------------------------|
| 810.5967                                                                                                                                                                                                                                                                                                                                                                                                                                                                                                                                                                                                                                                                                                 | 812.6067                                                                                                                                                                                                                                                                                                                                                                                                                                                                                                                                                                                                                                                                                                                                                                                                                                                                                                                                                                                                                                                                                                                                                          | 832.5772                                                                                                                                                                                                                                                                                                                                                                                                                                                                                                                                                                                                                                                                                                                                                                                                                                                                                                                                                                                                     |
| 20:1 [11Z] / 18:3 [6Z,9Z,12Z]<br>16:0 / 22:4 [7Z,10Z,13Z,16Z]<br>18:0 / 20:4 [8Z,11Z,14Z,17Z]<br>20:4 [8Z,11Z,14Z,17Z] / 18:0<br>18:4 [6Z,9Z,12Z,15Z] / 20:0<br>20:4 [5Z,8Z,11Z,14Z] / 18:0<br>18:1 [11Z] / 20:3 [5Z,8Z,11Z]<br>18:2 [9Z,12Z] / 20:2 [11Z,14Z]<br>22:4 [7Z,10Z,13Z,16Z] / 16:0<br>18:1 [11Z] / 20:3 [8Z,11Z,14Z]<br>20:0 / 18:4 [6Z,9Z,12Z,15Z]<br>18:1 [9Z] / 20:3 [8Z,11Z,14Z]<br>20:1 [11Z] / 18:3 [9Z,12Z,15Z]<br>18:1 [9Z] / 20:3 [5Z,8Z,11Z]<br>20:3 [8Z,11Z,14Z] / 18:1 [11Z]<br>18:3 [6Z,9Z,12Z] / 20:1 [11Z]<br>20:3 [5Z,8Z,11Z] / 18:1 [11Z]<br>20:3 [8Z,11Z,14Z] / 18:1 [9Z]<br>20:3 [5Z,8Z,11Z] / 18:1 [9Z]<br>18:3 [9Z,12Z,15Z] / 20:1 [11Z]<br>18:0 / 20:4 [5Z,8Z,11Z,14Z] | 20:3 [8Z,11Z,14Z] / 18:0<br>18:0 / 20:3 [8Z,11Z,14Z]<br>18:1 [11Z] / 20:2 [11Z,14Z]<br>18:1 [9Z] / 20:2 [11Z,14Z]<br>18:3 [9Z,12Z,15Z] / 20:0<br>20:1 [11Z] / 18:2 [9Z,12Z]<br>22:2 [13Z,16Z] / 16:1 [9Z]<br>18:0 / 20:3 [5Z,8Z,11Z]<br>20:2 [11Z,14Z] / 18:1 [9Z]<br>20:0 / 18:3 [9Z,12Z,15Z]<br>20:2 [11Z,14Z] / 18:1 [11Z]<br>18:2 [9Z,12Z] / 20:1 [11Z]<br>20:2 [11Z,14Z] / 18:1 [9Z]<br>20:5 [5Z,8Z,11Z,14Z,17Z] / 16:0<br>18:2 [9Z,12Z] / 22:5 [4Z,7Z,10Z,13Z,16Z]<br>20:4 [8Z,11Z,14Z,17Z] / 20:3 [8Z,11Z,14Z]<br>20:5 [5Z,8Z,11Z,14Z,17Z] / 20:2 [11Z,14Z]<br>18:2 [9Z,12Z] / 22:5 [4Z,7Z,10Z,13Z,16Z]<br>20:4 [8Z,11Z,14Z,17Z] / 20:3 [5Z,8Z,11Z]<br>20:3 [5Z,8Z,11Z] / 20:4 [5Z,8Z,11Z,14Z]<br>18:3 [9Z,12Z,15Z] / 22:4 [7Z,10Z,13Z,16Z]<br>20:3 [8Z,11Z,14Z] / 20:4 [8Z,11Z,14Z,17Z]<br>18:1 [11Z] / 22:6 [4Z,7Z,10Z,13Z,16Z,19Z]<br>22:5 [4Z,7Z,10Z,13Z,16Z] / 18:2 [9Z,12Z]<br>20:3 [5Z,8Z,11Z] / 20:4 [8Z,11Z,14Z,17Z]<br>18:2 [9Z,12Z] / 22:5 [7Z,10Z,13Z,16Z,19Z]<br>18:3 [6Z,9Z,12Z] / 22:4 [7Z,10Z,13Z,16Z]<br>20:3 [8Z,11Z,14Z] / 20:4 [5Z,8Z,11Z,14Z]<br>20:4 [5Z,8Z,11Z,14Z] / 20:3 [5Z,8Z,11Z]<br>22:5 [7Z,10Z,13Z,16Z,19Z] / 18:2 [9Z,12Z] | 18:1 [9Z] / 22:6 [4Z,7Z,10Z,13Z,16Z,19Z]<br>20:2 [11Z,14Z] / 20:5 [5Z,8Z,11Z,14Z,17Z]<br>22:6 [4Z,7Z,10Z,13Z,16Z,19Z] / 18:1 [11Z]<br>22:4 [7Z,10Z,13Z,16Z] / 18:3 [9Z,12Z,15Z]<br>20:4 [5Z,8Z,11Z,14Z] / 20:3 [8Z,11Z,14Z]<br>22:6 [4Z,7Z,10Z,13Z,16Z,19Z] / 18:1 [9Z]<br>22:4 [7Z,10Z,13Z,16Z] / 18:3 [6Z,9Z,12Z]<br>20:4 [8Z,11Z,14Z,17Z] / 20:3 [8Z,11Z,14Z]<br>20:5 [5Z,8Z,11Z,14Z,17Z] / 20:2 [11Z,14Z]<br>18:2 [9Z,12Z] / 22:5 [4Z,7Z,10Z,13Z,16Z]<br>20:4 [8Z,11Z,14Z,17Z] / 20:3 [5Z,8Z,11Z]<br>20:3 [5Z,8Z,11Z] / 20:4 [5Z,8Z,11Z,14Z]<br>18:3 [9Z,12Z,15Z] / 22:4 [7Z,10Z,13Z,16Z]<br>20:3 [8Z,11Z,14Z] / 20:4 [8Z,11Z,14Z,17Z]<br>18:1 [11Z] / 22:6 [4Z,7Z,10Z,13Z,16Z,19Z]<br>22:5 [4Z,7Z,10Z,13Z,16Z] / 18:2 [9Z,12Z]<br>20:3 [5Z,8Z,11Z] / 20:4 [8Z,11Z,14Z,17Z]<br>18:2 [9Z,12Z] / 22:5 [7Z,10Z,13Z,16Z,19Z]<br>18:3 [6Z,9Z,12Z] / 22:4 [7Z,10Z,13Z,16Z]<br>20:3 [8Z,11Z,14Z] / 20:4 [5Z,8Z,11Z,14Z]<br>20:4 [5Z,8Z,11Z,14Z] / 20:3 [5Z,8Z,11Z]<br>22:5 [7Z,10Z,13Z,16Z,19Z] / 18:2 [9Z,12Z] |
|                                                                                                                                                                                                                                                                                                                                                                                                                                                                                                                                                                                                                                                                                                          | 834.5969                                                                                                                                                                                                                                                                                                                                                                                                                                                                                                                                                                                                                                                                                                                                                                                                                                                                                                                                                                                                                                                                                                                                                          | 836.6099                                                                                                                                                                                                                                                                                                                                                                                                                                                                                                                                                                                                                                                                                                                                                                                                                                                                                                                                                                                                     |
|                                                                                                                                                                                                                                                                                                                                                                                                                                                                                                                                                                                                                                                                                                          | 18:1 [11Z] / 22:5 [7Z,10Z,13Z,16Z,19Z]<br>22:5 [4Z,7Z,10Z,13Z,16Z] / 18:1 [9Z]<br>20:3 [5Z,8Z,11Z] / 20:3 [8Z,11Z,14Z]<br>22:2 [13Z,16Z] / 18:4 [6Z,9Z,12Z,15Z]<br>18:1 [11Z] / 22:5 [4Z,7Z,10Z,13Z,16Z]<br>20:3 [8Z,11Z,14Z] / 20:3 [5Z,8Z,11Z]<br>22:5 [4Z,7Z,10Z,13Z,16Z] / 18:1 [11Z]<br>20:3 [8Z,11Z,14Z] / 20:3 [8Z,11Z,14Z]<br>18:2 [9Z,12Z] / 22:4 [7Z,10Z,13Z,16Z]<br>20:2 [11Z,14Z] / 20:4 [8Z,11Z,14Z,17Z]<br>20:5 [5Z,8Z,11Z,14Z,17Z] / 20:1 [11Z]<br>18:1 [9Z] / 22:5 [4Z,7Z,10Z,13Z,16Z]<br>18:4 [6Z,9Z,12Z,15Z] / 22:2 [13Z,16Z]<br>22:6 [4Z,7Z,10Z,13Z,16Z,19Z] / 18:0<br>20:1 [11Z] / 20:5 [5Z,8Z,11Z,14Z,17Z]<br>22:4 [7Z,10Z,13Z,16Z] / 18:2 [9Z,12Z]<br>22:5 [7Z,10Z,13Z,16Z,19Z] / 18:1 [9Z]<br>20:2 [11Z,14Z] / 20:4 [5Z,8Z,11Z,14Z]<br>18:0 / 22:6 [4Z,7Z,10Z,13Z,16Z,19Z]<br>22:2 [13Z,16Z] / 18:3 [6Z,9Z,12Z]<br>18:1 [11Z] / 22:4 [7Z,10Z,13Z,16Z]<br>20:2 [11Z,14Z] / 20:3 [8Z,11Z,14Z]<br>20:5 [5Z,8Z,11Z,14Z,17Z] / 20:0<br>20:3 [8Z,11Z,14Z] / 20:2 [11Z,14Z]                                                                                                                                                                       | 18:3 [9Z,12Z,15Z] / 22:2 [13Z,16Z]<br>22:5 [7Z,10Z,13Z,16Z,19Z] / 18:0<br>20:1 [11Z] / 20:4 [5Z,8Z,11Z,14Z]<br>18:3 [6Z,9Z,12Z] / 22:2 [13Z,16Z]<br>20:4 [7Z,10Z,13Z,16Z] / 18:1 [11Z]<br>18:1 [9Z] / 22:4 [7Z,10Z,13Z,16Z]<br>20:2 [11Z,14Z] / 20:3 [5Z,8Z,11Z]<br>20:4 [5Z,8Z,11Z,14Z] / 20:1 [11Z]<br>22:1 [13Z] / 18:4 [6Z,9Z,12Z,15Z]<br>18:1 [9Z] / 22:4 [7Z,10Z,13Z,16Z]<br>20:2 [11Z,14Z] / 20:3 [5Z,8Z,11Z]<br>20:4 [5Z,8Z,11Z,14Z] / 20:1 [11Z]<br>22:4 [7Z,10Z,13Z,16Z] / 18:1 [9Z]<br>22:2 [13Z,16Z] / 18:3 [9Z,12Z,15Z]<br>20:4 [8Z,11Z,14Z,17Z] / 20:1 [11Z]<br>20:0 / 20:5 [5Z,8Z,11Z,14Z,17Z]<br>20:3 [5Z,8Z,11Z] / 20:2 [11Z,14Z]<br>22:5 [4Z,7Z,10Z,13Z,16Z] / 18:0<br>18:4 [6Z,9Z,12Z,15Z] / 22:1 [13Z]<br>18:0 / 22:5 [4Z,7Z,10Z,13Z,16Z]<br>22:2 [13Z,16Z] / 18:3 [6Z,9Z,12Z]<br>18:1 [11Z] / 22:4 [7Z,10Z,13Z,16Z]<br>20:2 [11Z,14Z] / 20:3 [8Z,11Z,14Z]<br>20:5 [5Z,8Z,11Z,14Z,17Z] / 20:0<br>20:3 [8Z,11Z,14Z] / 20:2 [11Z,14Z]                                                      |

Supplementary Table 2. Mass-to-charge (m/z) ratios that include only phosphatidylcholine species with saturated and mono-unsaturated fatty acyl groups.

|                                                                                                                                                                | m/z ratio                                                                                                                                                                               |                                                                                                                                                                                                          |
|----------------------------------------------------------------------------------------------------------------------------------------------------------------|-----------------------------------------------------------------------------------------------------------------------------------------------------------------------------------------|----------------------------------------------------------------------------------------------------------------------------------------------------------------------------------------------------------|
| 732.5537                                                                                                                                                       | 734.5667                                                                                                                                                                                | 760.5814                                                                                                                                                                                                 |
| 18:1 [9Z] / 14:0<br>18:1 [11Z] / 14:0<br>18:0 / 14:1 [9Z]<br>14:1 [9Z] / 18:0<br>14:0 / 18:1 [9Z]<br>16:1 [9Z] / 16:0<br>14:0 / 18:1 [11Z]<br>16:0 / 16:1 [9Z] | 16:0 / 16:0<br>18:0 / 14:0<br>14:0 / 18:0<br>20:0 / 14:1 [9Z]<br>16:0 / 18:1 [9Z]<br>14:1 [9Z] / 20:0<br>18:0 / 16:1 [9Z]<br>16:1 [9Z] / 18:0<br>18:1 [11Z] / 16:0<br>14:0 / 20:1 [11Z] | 18:1 [9Z] / 16:0<br>20:1 [11Z] / 14:0<br>16:0 / 18:1 [11Z]<br>20:0 / 14:1 [9Z]<br>16:0 / 18:1 [9Z]<br>14:1 [9Z] / 20:0<br>18:0 / 16:1 [9Z]<br>16:1 [9Z] / 18:0<br>18:1 [11Z] / 16:0<br>14:0 / 20:1 [11Z] |
